# Supplementary material
Source: publisher site journal article supplement (https://www.dovepress.com/article/supplementary_file/624827/624827%20Supplementary%20Material.docx)
Supplement: Supplementary file 1 [file 624827%20Supplementary%20Material.docx]

**Supplemental Table 1. Microsoft Teams Consultation Workflow Survey**

| **Item** | **Survey item** | **Question wording** | **Response options** |
| --- | --- | --- | --- |
| 1 | Department | Please select your primary clinical department. | Department selection |
| 2 | Provider type | Please select your role (e.g., attending physician, resident, advanced care provider, nurse). | Role selection |
| 3 | Years in practice | If you are a physician, include post-graduate years. | 1-3; 4-7; 8-11; 12+ |
| 4 | Overall satisfaction with MS Teams for consultations | On a scale from 1 (not satisfied) to 3 (satisfied), how satisfied are you with using MS Teams for consultations? Please consider aspects such as ease of use, communication efficiency, and integration into your workflow. | 1 = Not satisfied; 2 = Neutral; 3 = Satisfied |
| 5 | Impact of MS Teams on workflow compared with Spectra alone | Compared with using Spectra alone for consultations, how has integrating MS Teams affected your workflow? Please consider aspects such as time efficiency, ease of communication, and overall satisfaction. | Interrupted workflow; Has not changed workflow; Improved workflow |
| 6 | Ease of initiating or receiving a consultation using MS Teams | How easy do you find it to initiate or receive a consultation using MS Teams? Rate from 1 (difficult) to 3 (easy). | 1 = Difficult; 2 = Neither easy nor difficult; 3 = Easy |
| 7 | Self-rated proficiency in MS Teams | How would you rate yourself in proficiency in MS Teams? Rate from 1 (not proficient) to 3 (proficient). Proficiency includes easily opening, placing, and responding to consults; answering phone calls; creating groups; and tagging others. | 1 = Not proficient; 2 = Somewhat proficient; 3 = Proficient |
| 8 | Ease of reaching the team for further information or recommendations | How easy is it for you to reach the team for further information or recommendations? Rate from 1 (difficult) to 3 (easy). | 1 = Difficult; 2 = Neither easy nor difficult; 3 = Easy |
| 9 | Preferred mode of communication after initiating an MS Teams consult | After initiating an MS Teams consult, describe your preferred mode of communication. | I prefer Spectra after the initial consult; I prefer to use both MS Teams and Spectra; I prefer MS Teams after the initial consult |
| 10 | Frequency of delays in responses using MS Teams | How often do you encounter delays in responses using MS Teams? | I often encounter a delay; I sometimes encounter a delay; I have rarely encountered a delay |
| 11 | Perceived impact of MS Teams on patient care | How do you believe using MS Teams for consultations has impacted patient care? | Negatively; No significant impact; Positively |
| 12 | Additional positive workflow impacts | Is there any aspect of your workflow that is positively affected by using MS Teams for consultation that is not mentioned in the prior questions? | Free-text response |
| 13 | Additional negative workflow impacts | Is there any aspect of your workflow that is negatively affected by using MS Teams for consultation that is not mentioned in the prior questions? | Free-text response |

This anonymous survey was administered to emergency department (ED) and consulting clinicians to assess satisfaction with, and perceived impact of, a Microsoft Teams-based consultation workflow. Items used a 3-point Likert-type scale unless otherwise specified.

| **Supplemental Table 2. ED provider ratings on Microsoft Teams items (n = 82)** | | | | |
| --- | --- | --- | --- | --- |
|  |  |  |  |  |
| **Rating** | **Satisfaction (n)** | **Ease of use (n)** | **Proficiency (n)** | **Ease of reaching consultant (n)** |
| 3 | 64 | 67 | 61 | 44 |
| 2 | 17 | 14 | 20 | 34 |
| 1 | 0 | 0 | 0 | 3 |
|  |  |  |  |  |
| Rating scale: 1 = not satisfied / not easy / not proficient; 3 = satisfied / easy / proficient. | | | | |

| **Supplemental Table 3. Frequency of delays among ED providers using Microsoft Teams (n = 82)** | | | | | | |
| --- | --- | --- | --- | --- | --- | --- |
|  |  |  |  |  |  |  |
| **Response option** | **n** |  |  |  |  |  |
| I sometimes encounter a delay | 51 |  |  |  |  |  |
| I often encounter a delay | 20 |  |  |  |  |  |
| I have rarely encountered a delay | 11 |  |  |  |  |  |
|  |  |  |  |  |  |  |

| **Supplemental Table 4. ED vs non-ED comparisons for key outcomes** | | | | | |
| --- | --- | --- | --- | --- | --- |
|  |  |  |  |  |  |
| **Outcome** | **ED n/N (%)** |  | **Non-ED n/N (%)** |  | **p-value** |
| High satisfaction (3 vs 1–2) | 64/82 (78.0) |  | 22/39 (56.4) |  | 0.014 |
| Improved workflow (vs not improved) | 70/82 (85.4) |  | 24/39 (61.5) |  | 0.003 |
| Positive impact on patient care (vs not) | 73/82 (89.0) |  | 22/39 (56.4) |  | <0.001 |
| Delays often (vs sometimes/rarely) | 20/82 (24.4) |  | 6/39 (15.4) |  | 0.26 |
| Teams-favorable preference (vs Spectra only) | 77/82 (93.9) |  | 31/39 (79.5) |  | 0.017 |
|  |  |  |  |  |  |
| ED = emergency department |  |  |  |  |  |
